# Supplementary material
Source: PubMed Central journal article supplement (PMC4401629)
Supplement: NIHMS663257-supplement-1.pdf [file NIHMS663257-supplement-1.pdf]

Supplementary Table 1. ICD-9 and CPT codes for study variables

| Variable                                    | ICD-9 Code unless specified                                       |
|---------------------------------------------|-------------------------------------------------------------------|
| Osteoporosis                                | 733.0x                                                            |
| Dual Energy X-ray absorptiometry (DXA) scan | CPT Codes: 76075, 76076, 77079, 76499, 77080, 77081, 77082, 77083 |
| <b>Lifestyle Factors</b>                    |                                                                   |
| Alcohol Abuse                               | 303.xx, 305.0x                                                    |
| Falling                                     | E880-E888.xx                                                      |
| Vitamin D insufficiency                     | 268.xx                                                            |
| Excess Vitamin A                            | 278.2                                                             |
| <b>Genetic factors</b>                      |                                                                   |
| Cystic fibrosis                             | 277.0x                                                            |
| Homocystinuria                              | 270.4                                                             |
| Osteogenesis imperfecta                     | 756.51                                                            |
| Ehlers-Danos                                | 756.83                                                            |
| Hypophosphatasia                            | 275.3                                                             |
| Gaucher's disease                           | 272.7                                                             |
| Idiopathic hypercalciuria                   | 275.4                                                             |
| Porphyria                                   | 277.1                                                             |
| Glycogen storage diseases                   | 271.0                                                             |
| Marfan syndrome                             | 759.82                                                            |
| Riley-Day syndrome                          | 742.8                                                             |
| Hemochromatosis                             | 275.03                                                            |
| Menkes steely hair syndrome                 | 759.89                                                            |
| <b>Hypogonadal states</b>                   |                                                                   |
| Androgen insensitivity                      | 259.5x                                                            |
| Anorexia nervosa and bulimia                | 307.1, 783.0, 307.51                                              |
| Hyperprolactinemia                          | 253.1                                                             |
| Premature ovarian failure                   | 256.31                                                            |
| Athletic amenorrhea                         | 626.0                                                             |
| Turner and Klinefelters's syndromes         | 758.6, 758.7                                                      |
| Panhypopituitarism                          | 253.7                                                             |
| <b>Endocrine disorders</b>                  |                                                                   |
| Adrenal insufficiency                       | 255.4                                                             |
| Diabetes mellitus (Type 1 & 2)              | 250.xx                                                            |
| Cushing's syndrome                          | 255.0                                                             |
| Hyperparathyroidism                         | 252.0x                                                            |
| Central Adiposity                           | 278.xx                                                            |
| Thyrotoxicosis                              | 242.xx                                                            |
| <b>Gastrointestinal disorders</b>           |                                                                   |
| Celiac disease                              | 579.0                                                             |

|                                              |                                                                                                                           |
|----------------------------------------------|---------------------------------------------------------------------------------------------------------------------------|
| Gastric bypass                               | CPT Codes: 43644, 43645, 43770, 43771, 43772, 43773, 43774, 43842, 43843, 43845, 43846, 43847, 43848, 43886, 43887, 43888 |
| Inflammatory Bowel Disease                   | 555-556.xx                                                                                                                |
| Malabsorption                                | 579.xx                                                                                                                    |
| Pancreatic disease                           | 751.7, 577.xx                                                                                                             |
| Primary biliary cirrhosis                    | 571.6                                                                                                                     |
| <b>Hematologic disorders</b>                 |                                                                                                                           |
| Hemophilia                                   | 286.xx                                                                                                                    |
| Thalassemia                                  | 282.4x                                                                                                                    |
| Sickle cell disease                          | 282.6x                                                                                                                    |
| Systemic mastocytosis                        | 757.33, 202.6                                                                                                             |
| <b>Rheumatologic and autoimmune diseases</b> |                                                                                                                           |
| Ankylosing spondylitis                       | 720.xx                                                                                                                    |
| Lupus                                        | 710.0                                                                                                                     |
| Rheumatoid arthritis                         | 714.xx                                                                                                                    |
| <b>Central nervous system disorders</b>      |                                                                                                                           |
| Epilepsy                                     | 345.xx                                                                                                                    |
| Parkinson's disease                          | 332.xx                                                                                                                    |
| Stroke                                       | 430-438.xx                                                                                                                |
| Multiple sclerosis                           | 340.xx                                                                                                                    |
| Spinal cord injury                           | 806.xx, 952.xx                                                                                                            |
| Alzheimers*                                  | 290.xx, 294.xx, 330-331.xx                                                                                                |
| <b>Miscellaneous conditions and diseases</b> |                                                                                                                           |
| AIDS/HIV                                     | 042-044.xx                                                                                                                |
| Congestive Heart Failure                     | 428.xx, 398.91, 402.01, 402.11, 402.91, 404.01, 404.11, 404.91                                                            |
| Muscular dystrophy                           | 359.0-359.1x                                                                                                              |
| Depression                                   | 311.xx, 295-298.xx                                                                                                        |
| Amyloidosis                                  | 277.3x                                                                                                                    |
| End stage renal disease                      | 585.6                                                                                                                     |
| Sarcoidosis                                  | 135.xx                                                                                                                    |
| Chronic metabolic acidosis                   | 276.2                                                                                                                     |
| Hypercalciuria                               | 245.40                                                                                                                    |
| Asthma/Chronic obstructive lung disease      | 496.xx, 491-493.xx, 514.xx, 511.9, 518.0, 793.1, 786.09, 491.21                                                           |
| Idiopathic scoliosis                         | 737.xx                                                                                                                    |
| Cataracts*                                   | 366.1-366.9, 366.02, 366.03, 366.04, 366.09, 366.20, 379.31, V43.1                                                        |
| Glaucoma*                                    | 365.xx                                                                                                                    |
| Kyphosis*                                    | 737.1x, 737.41, 737.3x                                                                                                    |
| <b>Medications Classes</b>                   |                                                                                                                           |
| Cyclosporine A and tacrolimus                |                                                                                                                           |

Proton pump inhibitors  
Anticoagulants  
Selective serotonin reuptake inhibitors  
Anticonvulsants  
Glucocorticoids  
Aromatase inhibitors  
GnRH (Gonadotropin releasing hormone)  
antagonists and agonists  
Thiazolidinediones  
Barbiturates  
Lithium  
Methotrexate  
Calcitonin  
Hormone Replacement Therapy  
Raloxifene

---

ICD-9: International Classification of Disease Version 9; CPT: Common Procedure Terminology; Medication Classes were based on National Drug Code (NDC) codes within each drug class; \*: Conditions associated with falling
