# Supplementary material
Source: PubMed Central journal article supplement (PMC4401629)
Supplement: NIHMS663257-supplement-2.pdf [file NIHMS663257-supplement-2.pdf]

Supplementary Table 2. Fracture Definitions

| Fracture             | Definition                                                                                                                                                                                                                                                                                                                                                                           |
|----------------------|--------------------------------------------------------------------------------------------------------------------------------------------------------------------------------------------------------------------------------------------------------------------------------------------------------------------------------------------------------------------------------------|
| Humerus <sup>a</sup> | Humerus fracture diagnosis (ICD-9: 812.xx, 733.11) AND procedure within 30 days of fracture date (ICD-9: 78.52, 79.01, 79.11, 79.21, 79.31, 79.61; CPT-4: 23600, 23605, 23610, 23615, 23620, 23625, 23630, 23665, 23670, 23680, 24500, 24505, 24506, 24510, 24515, 24530, 24531, 24535, 24536, 24538, 24540, 24542, 24545, 24560, 24565, 24570, 24575, 24581, 24583, 24585-8, 24516) |
| Wrist <sup>a</sup>   | Radius/ulna fracture diagnosis (ICD-9: 813.xx, 733.12) AND procedure within 30 days of fracture date (ICD-9: 78.53, 79.02, 79.12, 79.22, 79.32, 79.62; CPT-4: 24620, 24625, 24635, 24650, 24655, 24660, 24665-6, 24670, 24680, 24685, 25500, 25505, 25510, 25515, 25530, 25535, 25540, 25545, 25560, 25565, 25570, 25575, 25600, 25605, 25610-1, 25615, 25620, 25650)                |
| Hip <sup>a</sup>     | Hip fracture diagnosis (ICD-9 code: 820.xx,733.14) during hospitalization AND procedure code during hospitalization (ICD-9: 78.55, 79.05, 79.15, 79.25, 79.35, 79.65; CPT-4: 27230-27248)                                                                                                                                                                                            |
| Pelvis <sup>a</sup>  | Pelvis fracture diagnosis (ICD-9: 808.xx)                                                                                                                                                                                                                                                                                                                                            |
| Vertebral            | (ICD-9: 805.8, 805.9, 806.8, 806.9, 733.13)                                                                                                                                                                                                                                                                                                                                          |
| Cervical spine       | (ICD-9: 805.00 - 805.18; 806.0 - 806.19)                                                                                                                                                                                                                                                                                                                                             |
| Thoracic spine       | (ICD-9: 805.2, 805.3, 806.20 - 806.39)                                                                                                                                                                                                                                                                                                                                               |
| Lumbar spine         | (ICD-9: 805.4, 805.5, 806.4, 806.5)                                                                                                                                                                                                                                                                                                                                                  |

<sup>a</sup>: Adapted from Kim et al [38]
