# Supplementary material
Source: PubMed Central journal article supplement (PMC4401629)
Supplement: NIHMS663257-supplement-3.pdf [file NIHMS663257-supplement-3.pdf]

Supplementary Table 3. Basic Demographics of patients who filled (AOM users) or did not fill (AOM non-users) an anti-osteoporosis medication within 90 days of starting a glucocorticoid (2000-2012)

| Characteristic                           | Crude Population |               |    | Weighted Population |               |   |
|------------------------------------------|------------------|---------------|----|---------------------|---------------|---|
|                                          | AOM users        | AOM non-users | p  | AOM users           | AOM non-users | p |
| N                                        | 952              | 6933          |    | 937                 | 6937          |   |
| Region, N (%)                            |                  |               | *  |                     |               |   |
| North Central                            | 322 (33.8)       | 2244 (32.4)   |    | 310 (33.1)          | 2261 (32.6)   |   |
| Northeast                                | 160 (16.8)       | 984 (14.2)    |    | 138 (14.7)          | 1001 (14.4)   |   |
| South                                    | 228 (23.9)       | 1956 (28.2)   |    | 246 (26.3)          | 1917 (27.6)   |   |
| West                                     | 231 (24.3)       | 1653 (23.8)   |    | 234 (25.0)          | 1666 (24.0)   |   |
| Unknown                                  | 11 (1.2)         | 96 (1.4)      |    | 8 (0.9)             | 92 (1.3)      |   |
| Mean Age (SD)                            | 67.5 (10.6)      | 66.6 (11.4)   | *  | 67.0 (11.4)         | 66.7 (11.3)   |   |
| Age by decade <sup>b</sup>               |                  |               | ** |                     |               |   |
| 50-59                                    | 260 (27.3)       | 2421 (34.9)   |    | 296 (31.6)          | 2360 (34.0)   |   |
| 60-69                                    | 276 (29.0)       | 1839 (26.5)   |    | 256 (27.4)          | 1867 (26.9)   |   |
| 70-79                                    | 270 (28.4)       | 1535 (22.1)   |    | 221 (23.6)          | 1576 (22.7)   |   |
| 80+                                      | 146 (15.3)       | 1138 (16.4)   |    | 163 (17.4)          | 1135 (16.4)   |   |
| Year of Index Fill, N (%)                |                  |               | ** |                     |               |   |
| 2001                                     | 27 (2.8)         | 195 (2.8)     |    | 24 (2.6)            | 195 (2.8)     |   |
| 2002                                     | 80 (8.4)         | 466 (6.7)     |    | 61 (6.5)            | 482 (6.9)     |   |
| 2003                                     | 96 (10.1)        | 493 (7.1)     |    | 76 (8.2)            | 518 (7.5)     |   |
| 2004                                     | 99 (10.4)        | 677 (9.8)     |    | 91 (9.7)            | 684 (9.9)     |   |
| 2005                                     | 127 (13.3)       | 760 (11.0)    |    | 119 (12.7)          | 784 (11.3)    |   |
| 2006                                     | 97 (10.2)        | 527 (7.6)     |    | 71 (7.6)            | 547 (7.9)     |   |
| 2007                                     | 73 (7.7)         | 532 (7.7)     |    | 64 (6.8)            | 534 (7.7)     |   |
| 2008                                     | 93 (9.8)         | 574 (8.3)     |    | 81 (8.7)            | 587 (8.5)     |   |
| 2009                                     | 94 (9.9)         | 748 (10.8)    |    | 108 (11.6)          | 738 (10.6)    |   |
| 2010                                     | 65 (6.8)         | 612 (8.8)     |    | 80 (8.5)            | 596 (8.6)     |   |
| 2011                                     | 68 (7.1)         | 789 (11.4)    |    | 98 (10.5)           | 752 (10.8)    |   |
| 2012                                     | 33 (3.5)         | 560 (8.1)     |    | 62 (6.6)            | 521 (7.5)     |   |
| Type of Insurance                        |                  |               | ** |                     |               |   |
| CDHP                                     | 4 (0.4)          | 81 (1.2)      |    | 4 (0.4)             | 78 (1.1)      |   |
| Comprehensive                            | 321 (33.7)       | 2080 (30.0)   |    | 291 (31.1)          | 2115 (30.5)   |   |
| EPO                                      | 5 (0.5)          | 33 (0.5)      |    | 8 (0.9)             | 32 (0.5)      |   |
| HDHP                                     | 1 (0.1)          | 35 (0.5)      |    | 2 (0.2)             | 33 (0.5)      |   |
| HMO                                      | 192 (20.2)       | 1383 (19.9)   |    | 194 (20.8)          | 1400 (20.2)   |   |
| POS                                      | 44 (4.6)         | 375 (5.4)     |    | 45 (4.8)            | 377 (5.4)     |   |
| POS with capitation                      | 10 (1.1)         | 102 (1.5)     |    | 9 (1.0)             | 102 (1.5)     |   |
| PPO                                      | 363 (38.1)       | 2709 (39.1)   |    | 368 (39.3)          | 2670 (38.5)   |   |
| Unknown                                  | 12 (1.3)         | 135 (1.9)     |    | 15 (1.6)            | 131 (1.9)     |   |
| <b><i>In 365 days prior to index</i></b> |                  |               |    |                     |               |   |
| Osteoporosis, N (%)                      | 80 (8.4)         | 222 (3.2)     | ** | 41 (4.4)            | 272 (3.9)     |   |
| <b>Lifestyle Factors, N (%)</b>          |                  |               |    |                     |               |   |

| Characteristic                                   | Crude Population |               |    | Weighted Population |               |   |
|--------------------------------------------------|------------------|---------------|----|---------------------|---------------|---|
|                                                  | AOM users        | AOM non-users | p  | AOM users           | AOM non-users | p |
| Alcohol Abuse <sup>a</sup>                       | 0 (0.0)          | 16 (0.2)      |    | 0 (0.0)             | 15 (0.2)      |   |
| Falling                                          | 5 (0.5)          | 39 (0.6)      |    | 5 (0.5)             | 39 (0.6)      |   |
| Vitamin D insufficiency                          | 7 (0.7)          | 168 (2.4)     | ** | 16 (1.7)            | 154 (2.2)     |   |
| Excess Vitamin A                                 | 1 (0.1)          | 11 (0.2)      |    | 1 (0.1)             | 11 (0.2)      |   |
| <b>Genetic factors, N (%)</b>                    |                  |               |    |                     |               |   |
| Cystic fibrosis <sup>a</sup>                     | 0 (0.0)          | 0 (0.0)       |    | 0 (0.0)             | 0 (0.0)       |   |
| Homocystinuria <sup>a</sup>                      | 1 (0.1)          | 2 (0.0)       |    | 0 (0.0)             | 2 (0.0)       |   |
| Osteogenesis imperfecta <sup>a</sup>             | 0 (0.0)          | 0 (0.0)       |    | 0 (0.0)             | 0 (0.0)       |   |
| Ehlers-Danos <sup>a</sup>                        | 0 (0.0)          | 0 (0.0)       |    | 0 (0.0)             | 0 (0.0)       |   |
| Hypophosphatasia <sup>a</sup>                    | 0 (0.0)          | 16 (0.2)      |    | 0 (0.0)             | 15 (0.2)      |   |
| Gaucher's disease <sup>a</sup>                   | 0 (0.0)          | 3 (0.0)       |    | 0 (0.0)             | 3 (0.0)       |   |
| Idiopathic hypercalciuria                        | 16 (1.7)         | 86 (1.2)      |    | 10 (1.0)            | 88 (1.3)      |   |
| Porphyria <sup>a</sup>                           | 0 (0.0)          | 1 (0.0)       |    | 0 (0.0)             | 1 (0.0)       |   |
| Glyogen storage diseases <sup>a</sup>            | 0 (0.0)          | 0 (0.0)       |    | 0 (0.0)             | 0 (0.0)       |   |
| Marfan syndrome <sup>a</sup>                     | 0 (0.0)          | 0 (0.0)       |    | 0 (0.0)             | 0 (0.0)       |   |
| Riley-Day syndrome <sup>a</sup>                  | 0 (0.0)          | 0 (0.0)       |    | 0 (0.0)             | 0 (0.0)       |   |
| Hemochromatosis <sup>a</sup>                     | 0 (0.0)          | 0 (0.0)       |    | 0 (0.0)             | 0 (0.0)       |   |
| Menkes steely hair syndrome <sup>a</sup>         | 0 (0.0)          | 0 (0.0)       |    | 0 (0.0)             | 0 (0.0)       |   |
| <b>Hypogonadal states, N (%)</b>                 |                  |               |    |                     |               |   |
| Androgen insensitivity <sup>a</sup>              | 0 (0.0)          | 1 (0.0)       |    | 0 (0.0)             | 1 (0.0)       |   |
| Anorexia nervosa and bulimia                     | 2 (0.2)          | 16 (0.2)      |    | 1 (0.1)             | 16 (0.2)      |   |
| Hyperprolactinemia                               | 0 (0.0)          | 0 (0.0)       |    | 0 (0.0)             | 0 (0.0)       |   |
| Premature ovarian failure <sup>a</sup>           | 0 (0.0)          | 0 (0.0)       |    | 0 (0.0)             | 0 (0.0)       |   |
| Athletic amenorrhea                              | 1 (0.1)          | 7 (0.1)       |    | 1 (0.1)             | 7 (0.1)       |   |
| Turner and Klinefelters's syndromes <sup>a</sup> | 0 (0.0)          | 0 (0.0)       |    | 0 (0.0)             | 0 (0.0)       |   |
| Panhypopituitarism <sup>a</sup>                  | 0 (0.0)          | 2 (0.0)       |    | 0 (0.0)             | 2 (0.0)       |   |
| <b>Endocrine disorders, N (%)</b>                |                  |               |    |                     |               |   |
| Adrenal insufficiency                            | 5 (0.5)          | 24 (0.3)      |    | 6 (0.7)             | 25 (0.4)      |   |
| Diabetes mellitus (Type 1 & 2)                   | 117 (12.3)       | 1182 (17.0)   | ** | 138 (14.8)          | 1143 (16.5)   |   |
| Cushing's syndrome <sup>a</sup>                  | 0 (0.0)          | 4 (0.1)       |    | 0 (0.0)             | 4 (0.1)       |   |

| Characteristic                                      | Crude Population |               |    | Weighted Population |               |   |
|-----------------------------------------------------|------------------|---------------|----|---------------------|---------------|---|
|                                                     | AOM users        | AOM non-users | p  | AOM users           | AOM non-users | p |
| Hyperparathyroidism                                 | 3 (0.3)          | 18 (0.3)      |    | 2 (0.2)             | 18 (0.3)      |   |
| Central Adiposity                                   | 16 (1.7)         | 244 (3.5)     | ** | 27 (2.9)            | 229 (3.3)     |   |
| Thyrotoxicosis                                      | 20 (2.1)         | 101 (1.5)     |    | 16 (1.7)            | 106 (1.5)     |   |
| <b>Gastrointestinal disorders, N (%)</b>            |                  |               |    |                     |               |   |
| Celiac disease                                      | 2 (0.2)          | 12 (0.2)      |    | 2 (0.2)             | 12 (0.2)      |   |
| Gastric bypass <sup>a</sup>                         | 0 (0.0)          | 4 (0.1)       |    | 0 (0.0)             | 4 (0.1)       |   |
| Inflammatory Bowel Disease                          | 12 (1.3)         | 271 (3.9)     | ** | 49 (5.3)            | 249 (3.6)     | * |
| Malabsorption                                       | 3 (0.3)          | 33 (0.5)      |    | 6 (0.6)             | 32 (0.5)      |   |
| Pancreatic disease                                  | 4 (0.4)          | 58 (0.8)      |    | 10 (1.1)            | 55 (0.8)      |   |
| Primary biliary cirrhosis                           | 4 (0.4)          | 23 (0.3)      |    | 3 (0.3)             | 24 (0.3)      |   |
| <b>Hematologic disorders, N (%)</b>                 |                  |               |    |                     |               |   |
| Hemophilia                                          | 9 (0.9)          | 80 (1.2)      |    | 7 (0.8)             | 78 (1.1)      |   |
| Thalassemia                                         | 0 (0.0)          | 3 (0.0)       |    | 0 (0.0)             | 3 (0.0)       |   |
| Sickle cell anemia                                  | 0 (0.0)          | 1 (0.0)       |    | 0 (0.0)             | 1 (0.0)       |   |
| Systemic mastocytosis                               | 0 (0.0)          | 0 (0.0)       |    | 0 (0.0)             | 0 (0.0)       |   |
| <b>Rheumatologic and autoimmune diseases, N (%)</b> |                  |               |    |                     |               |   |
| Ankylosing spondylitis                              | 7 (0.7)          | 61 (0.9)      |    | 6 (0.7)             | 60 (0.9)      |   |
| Lupus                                               | 28 (2.9)         | 219 (3.2)     |    | 30 (3.2)            | 218 (3.1)     |   |
| Rheumatoid arthritis                                | 135 (14.2)       | 1078 (15.5)   |    | 128 (13.7)          | 1066 (15.4)   |   |
| <b>Central nervous system disorders, N (%)</b>      |                  |               |    |                     |               |   |
| Epilepsy                                            | 5 (0.5)          | 52 (0.8)      |    | 8 (0.9)             | 50 (0.7)      |   |
| Parkinson's disease                                 | 1 (0.1)          | 36 (0.5)      |    | 1 (0.1)             | 32 (0.5)      |   |
| Stroke                                              | 90 (9.5)         | 621 (9.0)     |    | 83 (8.9)            | 626 (9.0)     |   |
| Multiple sclerosis                                  | 6 (0.6)          | 44 (0.6)      |    | 6 (0.7)             | 44 (0.6)      |   |
| Spinal cord injury                                  | 1 (0.1)          | 2 (0.0)       |    | 0 (0.0)             | 2 (0.0)       |   |
| Alzheimers                                          | 21 (2.2)         | 273 (3.9)     | ** | 40 (4.2)            | 259 (3.7)     |   |
| <b>Miscellaneous conditions and diseases, N (%)</b> |                  |               |    |                     |               |   |
| AIDS/HIV <sup>a</sup>                               | 0 (0.0)          | 6 (0.1)       |    | 0 (0.0)             | 6 (0.1)       |   |
| Congestive Heart Failure                            | 76 (8.0)         | 697 (10.1)    | *  | 84 (9.0)            | 677 (9.8)     |   |
| Muscular dystrophy                                  | 2 (0.2)          | 3 (0.0)       |    | 1 (0.1)             | 4 (0.1)       |   |
| Liver Disease                                       | 59 (6.2)         | 390 (5.6)     |    | 51 (5.5)            | 394 (5.7)     |   |
| Depression                                          | 45 (4.7)         | 518 (7.5)     | ** | 61 (6.5)            | 496 (7.1)     |   |
| Amyloidosis                                         | 2 (0.2)          | 1 (0.0)       | ** | 0 (0.0)             | 1 (0.0)       |   |
| End stage renal disease                             | 18 (1.9)         | 233 (3.4)     | *  | 42 (4.5)            | 222 (3.2)     | * |
| Sarcoidosis                                         | 25 (2.6)         | 143 (2.1)     |    | 19 (2.0)            | 147 (2.1)     |   |
| Chronic metabolic acidosis                          | 5 (0.5)          | 44 (0.6)      |    | 6 (0.6)             | 44 (0.6)      |   |

| Characteristic                                                              | Crude Population |               |    | Weighted Population |               |    |
|-----------------------------------------------------------------------------|------------------|---------------|----|---------------------|---------------|----|
|                                                                             | AOM users        | AOM non-users | p  | AOM users           | AOM non-users | p  |
| Asthma/Chronic obstructive lung disease                                     | 158 (16.6)       | 1352 (19.5)   | *  | 175 (18.7)          | 1328 (19.1)   |    |
| Idiopathic scoliosis                                                        | 6 (0.6)          | 48 (0.7)      |    | 5 (0.5)             | 48 (0.7)      |    |
| Cataracts                                                                   | 164 (17.2)       | 980 (14.1)    | *  | 141 (15.0)          | 1008 (14.5)   |    |
| Glaucoma                                                                    | 86 (9.0)         | 561 (8.1)     |    | 78 (8.3)            | 570 (8.2)     |    |
| Kyphosis                                                                    | 171 (18.0)       | 768 (11.1)    | ** | 116 (12.4)          | 833 (12.0)    |    |
| <b>Medications, N (%)</b>                                                   |                  |               |    |                     |               |    |
| Cyclosporine A and tacrolimus                                               | 21 (2.2)         | 159 (2.3)     |    | 19 (2.0)            | 159 (2.3)     |    |
| Proton pump inhibitors                                                      | 257 (27.0)       | 1951 (28.1)   |    | 280 (29.9)          | 1943 (28.0)   |    |
| Anticoagulants                                                              | 57 (6.0)         | 587 (8.5)     | ** | 70 (7.5)            | 567 (8.2)     |    |
| Selective serotonin reuptake inhibitors                                     | 147 (15.4)       | 1263 (18.2)   | *  | 177 (18.9)          | 1245 (17.9)   |    |
| Anticonvulsants                                                             | 93 (9.8)         | 868 (12.5)    | *  | 133 (14.2)          | 847 (12.2)    |    |
| Aromatase inhibitors <sup>a</sup>                                           | 0 (0.0)          | 2 (0.0)       |    | 0 (0.0)             | 2 (0.0)       |    |
| GnRH (Gonadotropin releasing hormone) antagonists and agonists <sup>a</sup> | 0 (0.0)          | 0 (0.0)       |    | 0 (0.0)             | 0 (0.0)       |    |
| Thiazolidinediones                                                          | 15 (1.6)         | 204 (2.9)     | *  | 21 (2.2)            | 192 (2.8)     |    |
| Barbiturates                                                                | 1 (0.1)          | 17 (0.2)      |    | 8 (0.8)             | 16 (0.2)      | ** |
| Lithium                                                                     | 1 (0.1)          | 11 (0.2)      |    | 1 (0.2)             | 11 (0.2)      |    |
| Methotrexate                                                                | 55 (5.8)         | 389 (5.6)     |    | 51 (5.4)            | 391 (5.6)     |    |
| Calcitonin                                                                  | 11 (1.2)         | 86 (1.2)      |    | 10 (1.1)            | 86 (1.2)      |    |
| Hormone Replacement Therapy                                                 | 198 (20.8)       | 1347 (19.4)   |    | 186 (19.9)          | 1364 (19.7)   |    |
| Raloxifene                                                                  | 23 (2.4)         | 124 (1.8)     |    | 21 (2.2)            | 131 (1.9)     |    |
| <b>Healthcare Resources, N (%)</b>                                          |                  |               |    |                     |               |    |
| DXA                                                                         | 177 (18.6)       | 708 (10.2)    | ** | 111 (11.8)          | 788 (11.4)    |    |
| <b>Inpatient Admission</b>                                                  |                  |               |    |                     |               |    |
| 0                                                                           | 715 (75.1)       | 4993 (72.0)   |    | 682 (72.8)          | 5025 (72.4)   |    |
| 1                                                                           | 172 (18.1)       | 1441 (20.8)   |    | 187 (19.9)          | 1419 (20.5)   |    |
| 2+                                                                          | 65 (6.8)         | 499 (7.2)     |    | 68 (7.3)            | 494 (7.1)     |    |
| <b>Outpatient Visits</b>                                                    |                  |               |    |                     |               |    |
| 0                                                                           | 32 (3.4)         | 251 (3.6)     |    | 32 (3.4)            | 248 (3.6)     |    |
| 1 to 6                                                                      | 189 (19.9)       | 1465 (21.1)   |    | 185 (19.8)          | 1453 (20.9)   |    |
| 7 to 12                                                                     | 245 (25.7)       | 1620 (23.4)   |    | 216 (23.1)          | 1638 (23.6)   |    |
| 13+                                                                         | 486 (51.1)       | 3597 (51.9)   |    | 504 (53.8)          | 3598 (51.9)   |    |
| <b>Charlson Comorbidity Score</b>                                           |                  |               |    |                     |               |    |
| 0                                                                           | 811 (85.2)       | 5682 (82.0)   |    | 777 (83.0)          | 5716 (82.4)   |    |
| 1                                                                           | 27 (2.8)         | 212 (3.1)     |    | 28 (3.0)            | 210 (3.0)     |    |
| 2                                                                           | 55 (5.8)         | 498 (7.2)     |    | 71 (7.6)            | 487 (7.0)     |    |

| Characteristic                      | Crude Population |               |    | Weighted Population |               |   |
|-------------------------------------|------------------|---------------|----|---------------------|---------------|---|
|                                     | AOM users        | AOM non-users | p  | AOM users           | AOM non-users | p |
| 3-5                                 | 52 (5.5)         | 431 (6.2)     |    | 51 (5.4)            | 422 (6.1)     |   |
| 6+                                  | 7 (0.7)          | 110 (1.6)     |    | 10 (1.0)            | 103 (1.5)     |   |
| <b><i>In 90 days post index</i></b> |                  |               |    |                     |               |   |
| Osteoporosis, N (%)                 | 100 (10.5)       | 151 (2.2)     | ** | 34 (3.6)            | 225 (3.2)     |   |
| <b>Healthcare Resources, N (%)</b>  |                  |               |    |                     |               |   |
| DXA                                 | 264 (27.7)       | 626 (9.0)     | ** | 115 (12.3)          | 787 (11.3)    |   |
| <b>Inpatient Admission</b>          |                  |               |    |                     |               |   |
| 0                                   | 839 (88.1)       | 6198 (89.4)   |    | 833 (88.9)          | 6188 (89.2)   |   |
| 1                                   | 100 (10.5)       | 630 (9.1)     |    | 92 (9.8)            | 646 (9.3)     |   |
| 2+                                  | 13 (1.4)         | 105 (1.5)     |    | 12 (1.3)            | 103 (1.5)     |   |
| <b>Outpatient Visits</b>            |                  |               |    |                     |               |   |
| 0                                   | 46 (4.8)         | 425 (6.1)     |    | 54 (5.8)            | 414 (6.0)     |   |
| 1 to 6                              | 374 (39.3)       | 3116 (44.9)   |    | 397 (42.4)          | 3067 (44.2)   |   |
| 7 to 12                             | 324 (34.0)       | 2120 (30.6)   |    | 294 (31.4)          | 2153 (31.0)   |   |
| 13+                                 | 208 (21.8)       | 1272 (18.3)   | ** | 192 (20.4)          | 1303 (18.8)   |   |

\*:  $p \leq 0.05$ ; \*\*:  $p \leq 0.01$ ; <sup>a</sup>: Not included in propensity score due to no subjects in one or both groups; <sup>b</sup>: Not included in propensity score due to the use of continuous age; EPO: Exclusive Provider Organization; HMO: Health Maintenance Organization; POS: Point of Service; PPO: Preferred Provider Organization; CDHP: Consumer Directed Health Plan; HDHP: High deductible health plan
