# Supplementary material
Source: PubMed Central journal article supplement (PMC4401629)
Supplement: NIHMS663257-supplement-4.pdf [file NIHMS663257-supplement-4.pdf]

# Supplementary Figure 1. 1–Year Differing Quality Measure Periods

| Description | Type       | AOM/Non–AOM Ns | AOM Fx Rate | Non–AOM Rates* | Hazard Ratio |
|-------------|------------|----------------|-------------|----------------|--------------|
| 30 Day QM   | Unadjusted | 542 / 7535     | 21.15       | 24.70 / 121.29 | 0.84         |
|             | Adjusted   | 542 / 7535     | 21.15       | 24.70 / 121.29 | 0.79         |
|             | Weighted   | 542 / 7535     | 20.13       | 24.68 / 124.51 | 0.81         |
| 60 day QM   | Unadjusted | 801 / 7229     | 20.05       | 26.16 / 102.41 | 0.77         |
|             | Adjusted   | 801 / 7229     | 20.05       | 26.16 / 102.41 | 0.76         |
|             | Weighted   | 801 / 7229     | 17.76       | 26.03 / 106.28 | 0.68         |
| 120 Day QM  | Unadjusted | 1069 / 6576    | 22.73       | 27.59 / 81.34  | 0.83         |
|             | Adjusted   | 1069 / 6576    | 22.73       | 27.59 / 81.34  | 0.81         |
|             | Weighted   | 1069 / 6576    | 19.19       | 27.38 / 84.28  | 0.71         |
| 150 Day QM  | Unadjusted | 1153 / 6230    | 25.56       | 27.60 / 73.77  | 0.93         |
|             | Adjusted   | 1153 / 6230    | 25.56       | 27.60 / 73.77  | 0.93         |
|             | Weighted   | 1153 / 6230    | 22.65       | 27.37 / 76.45  | 0.83         |
| 180 day QM  | Unadjusted | 1174 / 5918    | 23.47       | 26.77 / 70.57  | 0.88         |
|             | Adjusted   | 1174 / 5918    | 23.47       | 26.77 / 70.57  | 0.88         |
|             | Weighted   | 1174 / 5918    | 21.71       | 26.56 / 72.98  | 0.82         |

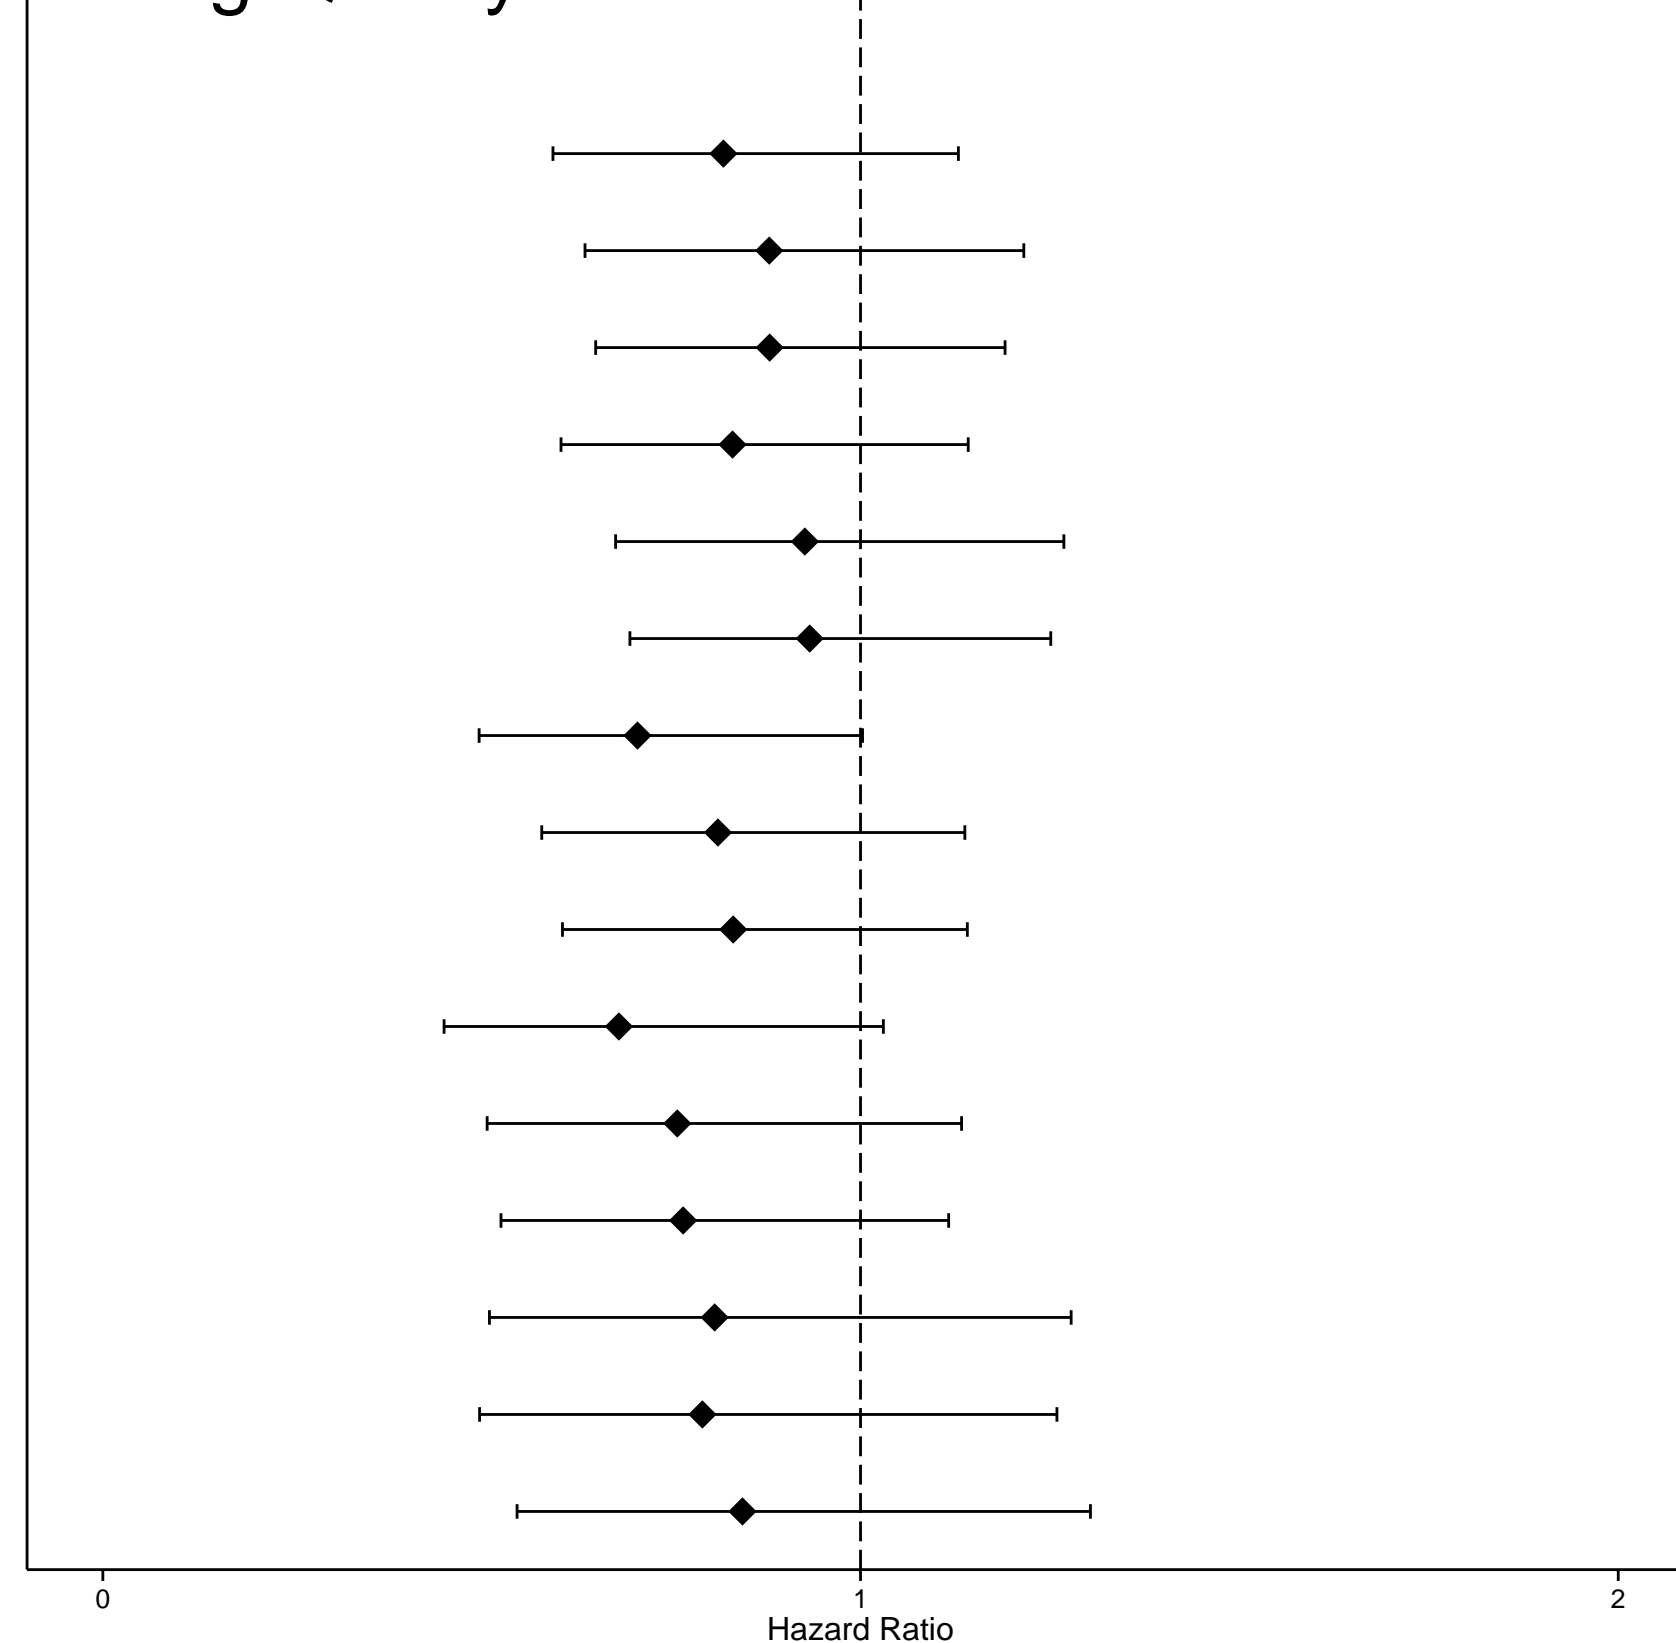

Rate: Event rate per 1,000 Person Years; \*Non–AOM Rates\*: This column is the Non–AOM Fracture Rate / Non–AOM Censor for AOM Use Rate
