# Supplementary material
Source: PubMed Central journal article supplement (PMC4401629)
Supplement: NIHMS663257-supplement-5.pdf [file NIHMS663257-supplement-5.pdf]

# Supplementary Figure 2. 3-Year Differing Quality Measure Periods

| Description | Type       | AOM/Non-AOM Ns | AOM Fx Rate | Non-AOM Rates* | Hazard Ratio |
|-------------|------------|----------------|-------------|----------------|--------------|
| 30 Day QM   | Unadjusted | 542 / 7535     | 10.59       | 25.11 / 183.26 | 0.41         |
|             | Adjusted   | 542 / 7535     | 10.59       | 25.11 / 183.26 | 0.42         |
|             | Weighted   | 542 / 7535     | 17.00       | 25.12 / 188.93 | 0.66         |
| 60 day QM   | Unadjusted | 801 / 7229     | 16.20       | 27.05 / 148.57 | 0.60         |
|             | Adjusted   | 801 / 7229     | 16.20       | 27.05 / 148.57 | 0.59         |
|             | Weighted   | 801 / 7229     | 13.17       | 27.03 / 155.60 | 0.48         |
| 120 Day QM  | Unadjusted | 1069 / 6576    | 21.32       | 28.72 / 112.07 | 0.75         |
|             | Adjusted   | 1069 / 6576    | 21.32       | 28.72 / 112.07 | 0.66         |
|             | Weighted   | 1069 / 6576    | 14.79       | 28.55 / 117.53 | 0.52         |
| 150 Day QM  | Unadjusted | 1153 / 6230    | 25.18       | 28.37 / 98.99  | 0.90         |
|             | Adjusted   | 1153 / 6230    | 25.18       | 28.37 / 98.99  | 0.84         |
|             | Weighted   | 1153 / 6230    | 19.83       | 27.99 / 103.86 | 0.71         |
| 180 day QM  | Unadjusted | 1174 / 5918    | 23.61       | 26.80 / 93.59  | 0.89         |
|             | Adjusted   | 1174 / 5918    | 23.61       | 26.80 / 93.59  | 0.83         |
|             | Weighted   | 1174 / 5918    | 20.04       | 26.47 / 97.89  | 0.76         |

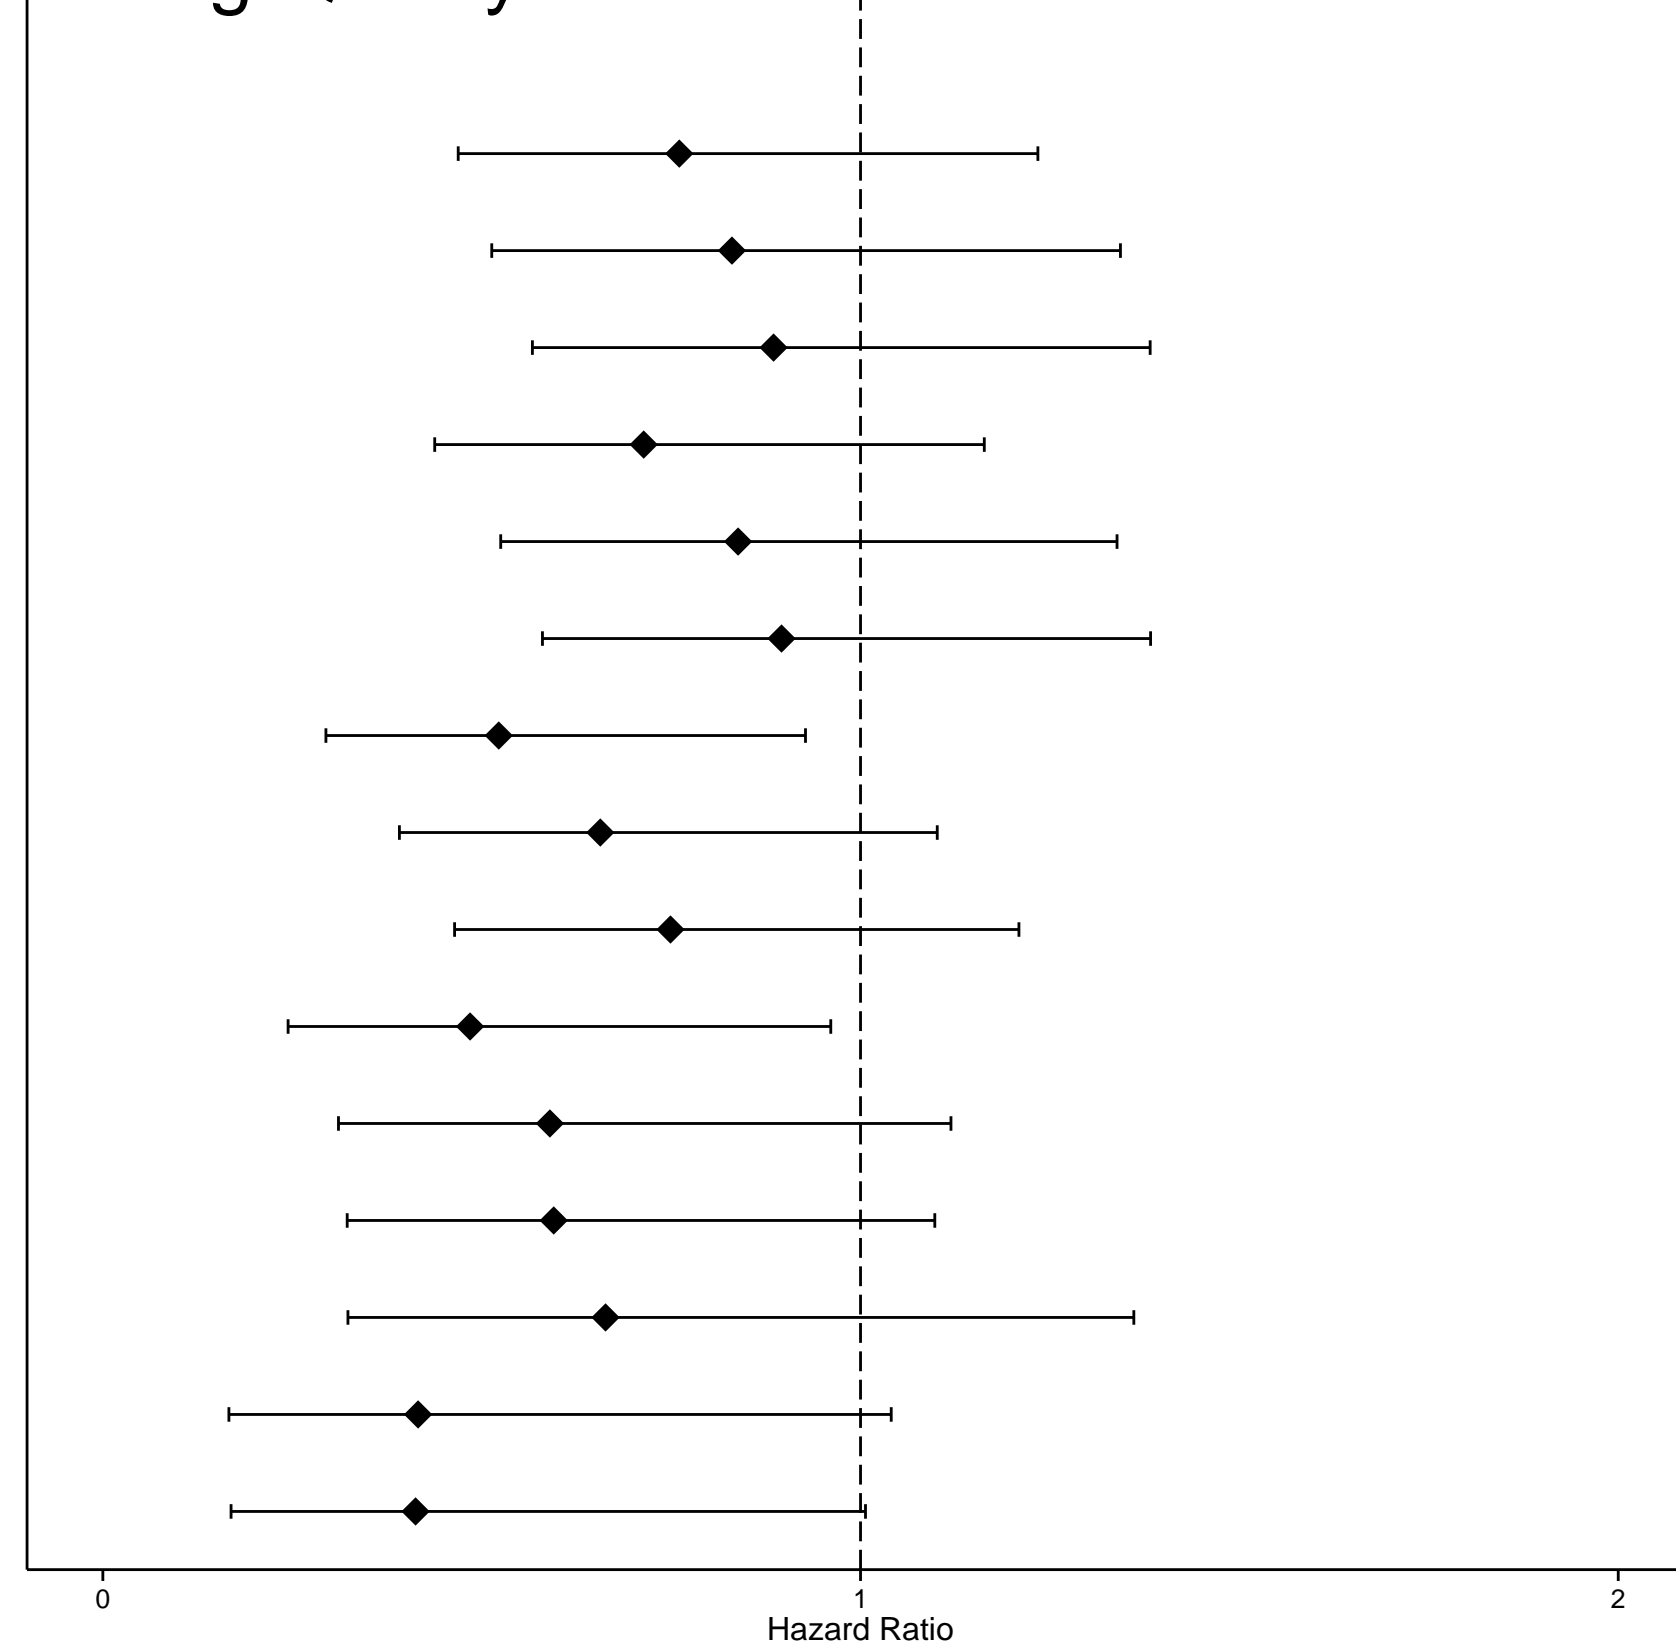

Rate: Event rate per 1,000 Person Years; \*Non-AOM Rates\*: This column is the Non-AOM Fracture Rate / Non-AOM Censor for AOM Use Rate
