# Supplementary material
Source: PubMed Central journal article supplement (PMC4401629)
Supplement: NIHMS663257-supplement-6.pdf [file NIHMS663257-supplement-6.pdf]

# Supplementary Figure 3. 1-Year Differing Fracture Definitions

| Description              | Type       | AOM/Non-AOM Ns | AOM Fx Rate | Non-AOM Rates* | Hazard Ratio |
|--------------------------|------------|----------------|-------------|----------------|--------------|
| Non-Spine Fractures      | Unadjusted | 952 / 6933     | 18.77       | 29.70 / 129.72 | 0.64         |
|                          | Adjusted   | 952 / 6933     | 18.77       | 29.70 / 129.72 | 0.63         |
|                          | Weighted   | 952 / 6933     | 14.67       | 29.56 / 136.28 | 0.50         |
| Only Spine Fractures     | Unadjusted | 952 / 6933     | 13.72       | 16.21 / 132.91 | 0.86         |
|                          | Adjusted   | 952 / 6933     | 13.72       | 16.21 / 132.91 | 0.91         |
|                          | Weighted   | 952 / 6933     | 10.79       | 16.19 / 139.43 | 0.67         |
| Only Vertebral Fractures | Unadjusted | 952 / 6933     | 2.05        | 4.96 / 44.62   | 0.51         |
|                          | Adjusted   | 952 / 6933     | 2.05        | 4.96 / 44.62   | 0.44         |
|                          | Weighted   | 952 / 6933     | 1.81        | 4.87 / 46.58   | 0.42         |
| No Cervical Fractures    | Unadjusted | 952 / 6933     | 1.71        | 4.57 / 44.62   | 0.46         |
|                          | Adjusted   | 952 / 6933     | 1.71        | 4.57 / 44.62   | 0.38         |
|                          | Weighted   | 952 / 6933     | 1.66        | 4.49 / 46.58   | 0.42         |

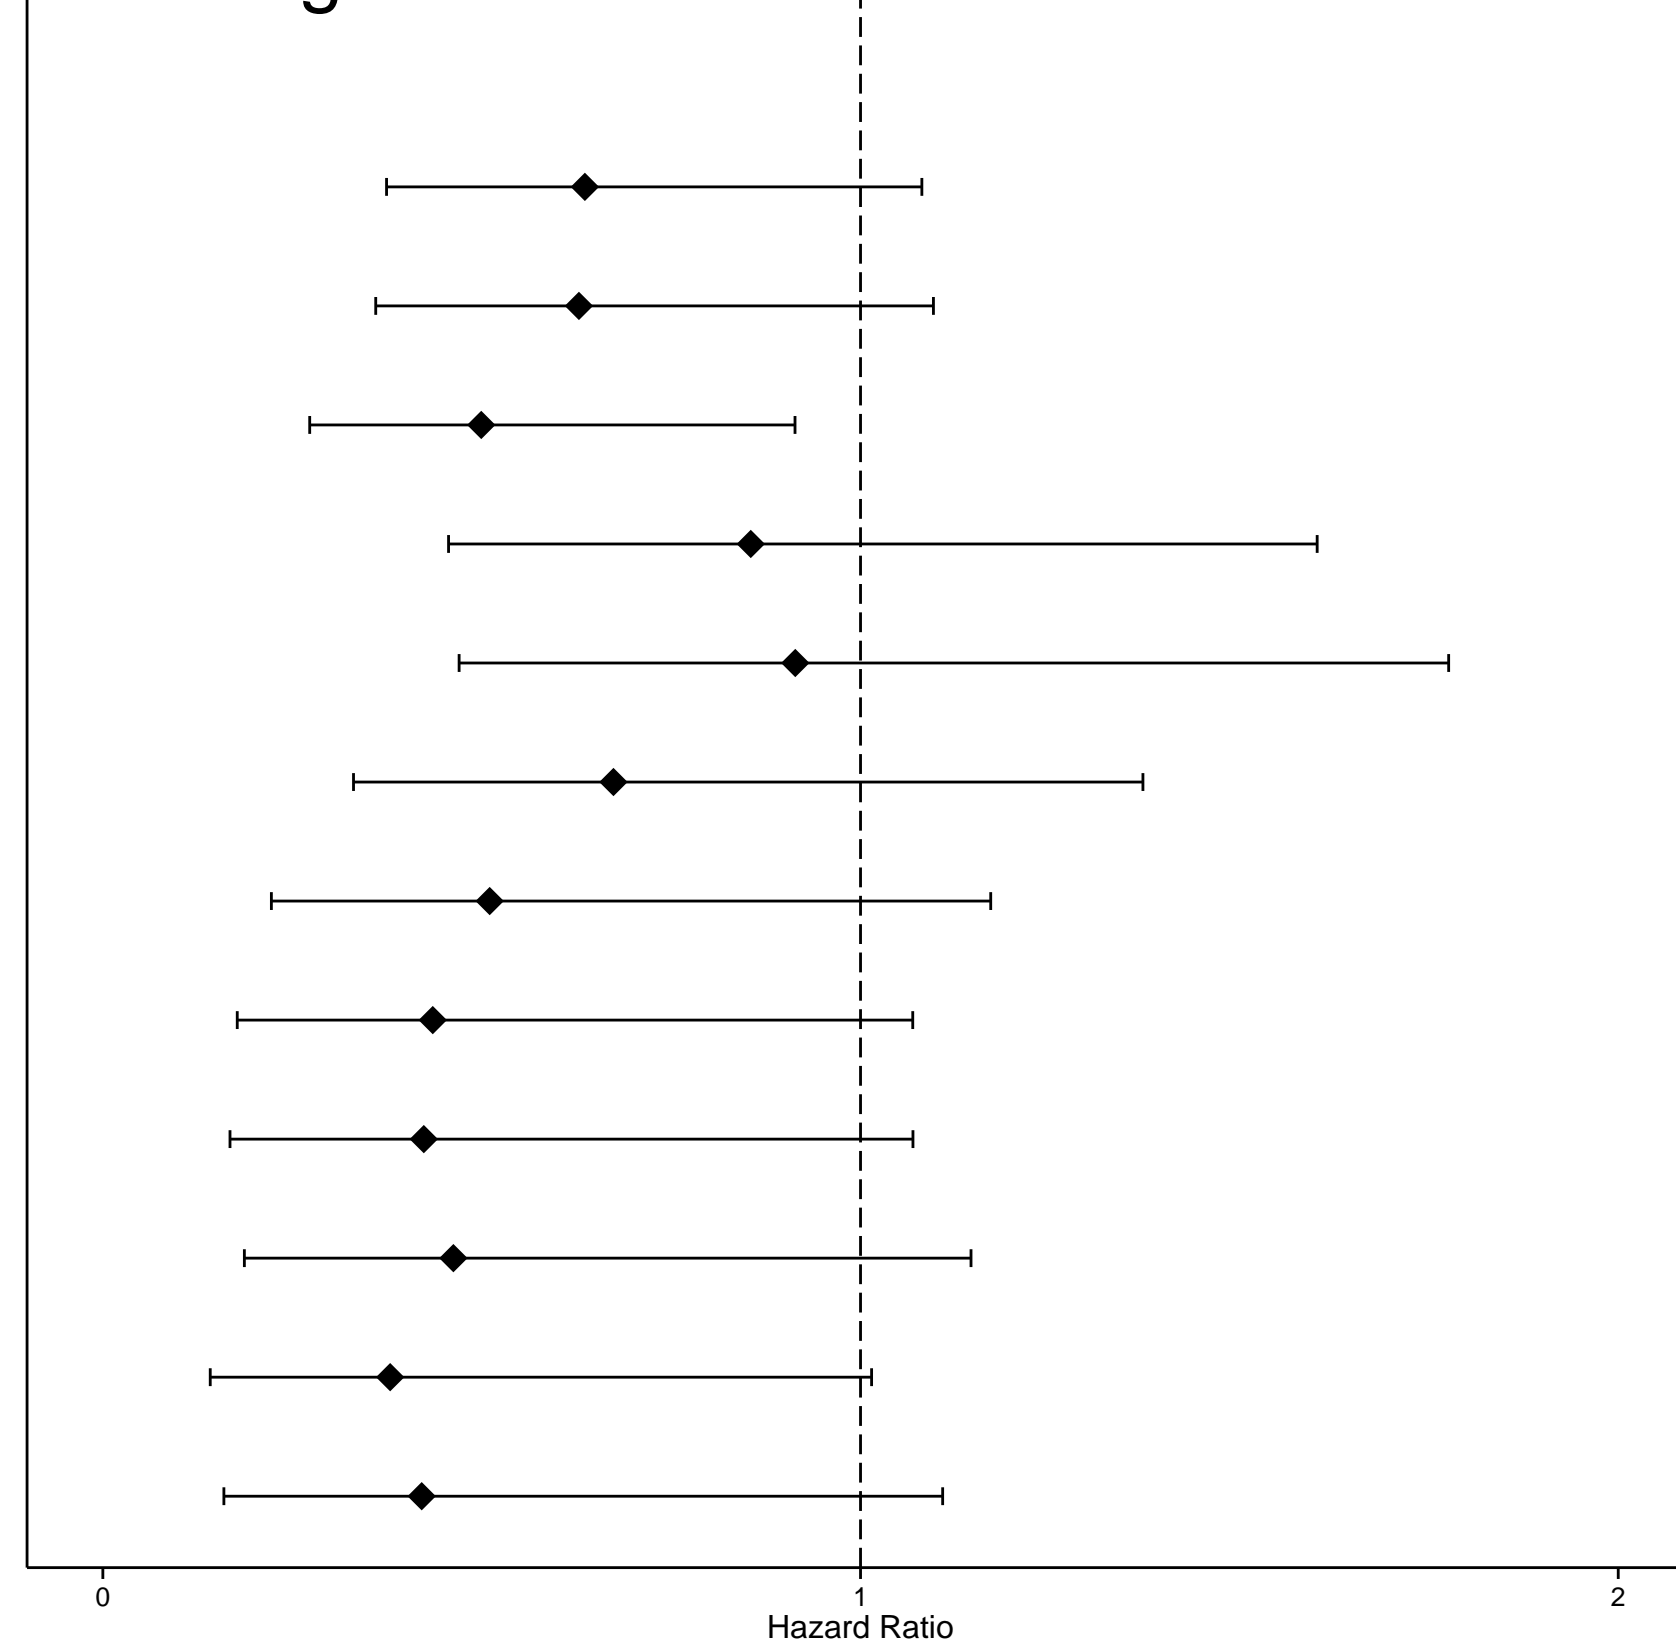

Rate: Event rate per 1,000 Person Years; \*Non-AOM Rates\*: This column is the Non-AOM Fracture Rate / Non-AOM Censor for AOM Use Rate
