# Supplementary material
Source: PubMed Central journal article supplement (PMC4401629)
Supplement: NIHMS663257-supplement-7.pdf [file NIHMS663257-supplement-7.pdf]

# Supplementary Figure 4. 3-Year Differing Fracture Definitions

| Description              | Type       | AOM/Non-AOM Ns | AOM Fx Rate | Non-AOM Rates* | Hazard Ratio |
|--------------------------|------------|----------------|-------------|----------------|--------------|
| Non-Spine Fractures      | Unadjusted | 952 / 6933     | 20.82       | 27.51 / 91.20  | 0.77         |
|                          | Adjusted   | 952 / 6933     | 20.82       | 27.51 / 91.20  | 0.76         |
|                          | Weighted   | 952 / 6933     | 18.02       | 27.32 / 94.77  | 0.66         |
| Only Spine Fractures     | Unadjusted | 952 / 6933     | 13.42       | 16.14 / 94.15  | 0.84         |
|                          | Adjusted   | 952 / 6933     | 13.42       | 16.14 / 94.15  | 0.91         |
|                          | Weighted   | 952 / 6933     | 11.46       | 16.04 / 97.68  | 0.72         |
| Only Vertebral Fractures | Unadjusted | 952 / 6933     | 5.47        | 8.63 / 62.01   | 0.70         |
|                          | Adjusted   | 952 / 6933     | 5.47        | 8.63 / 62.01   | 0.64         |
|                          | Weighted   | 952 / 6933     | 4.96        | 8.51 / 64.20   | 0.62         |
| No Cervical Fractures    | Unadjusted | 952 / 6933     | 5.12        | 8.24 / 62.07   | 0.68         |
|                          | Adjusted   | 952 / 6933     | 5.12        | 8.24 / 62.07   | 0.62         |
|                          | Weighted   | 952 / 6933     | 4.81        | 8.13 / 64.26   | 0.63         |

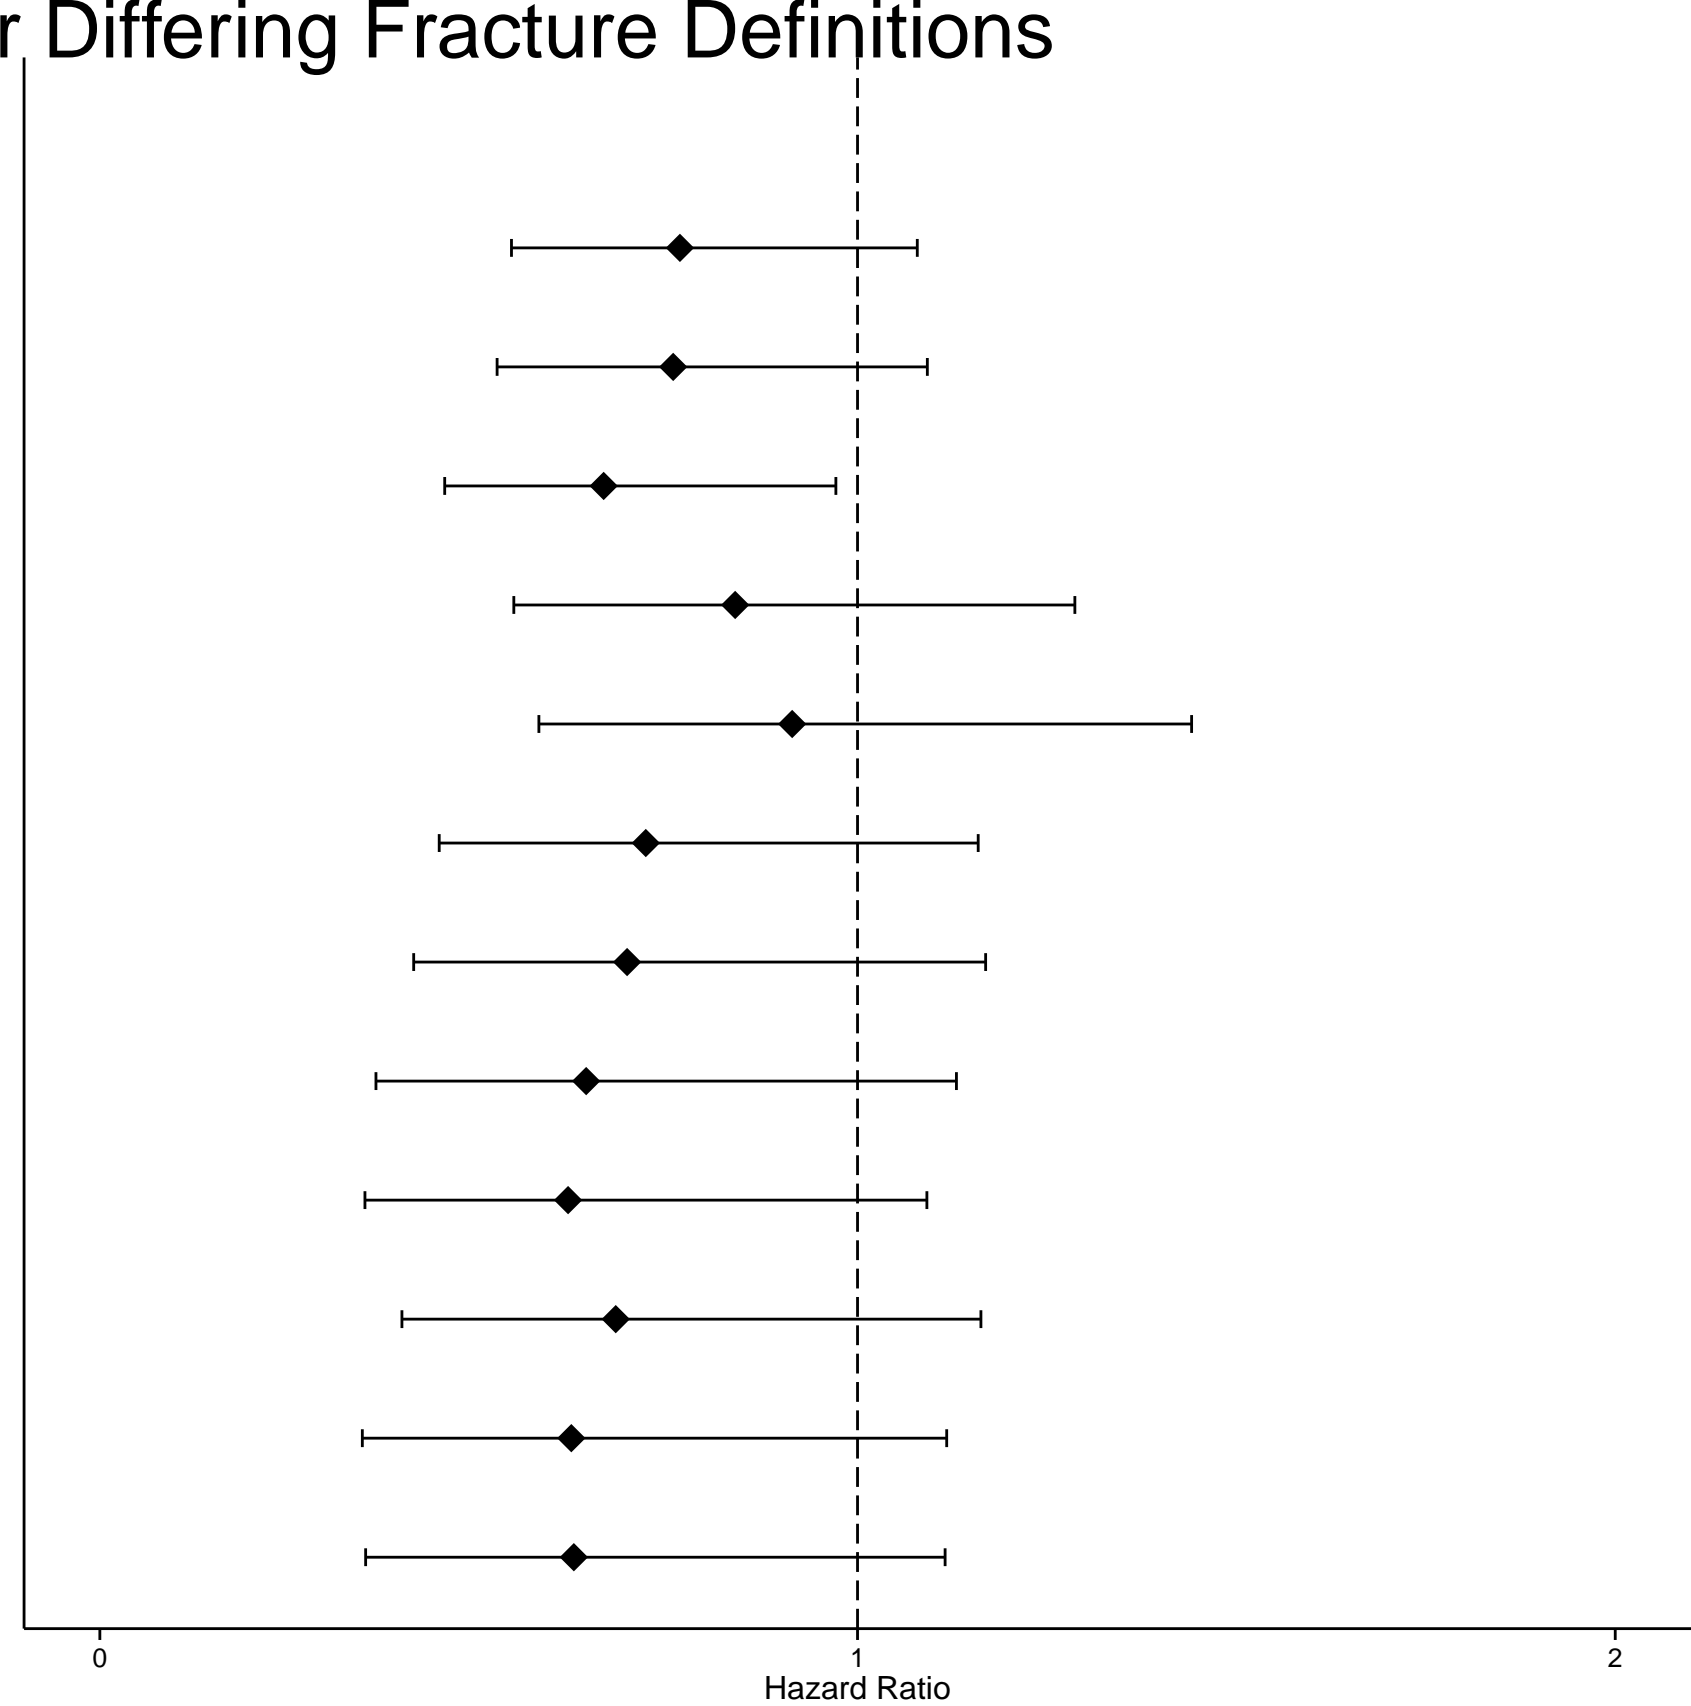

Rate: Event rate per 1,000 Person Years; \*Non-AOM Rates\*: This column is the Non-AOM Fracture Rate / Non-AOM Censor for AOM Use Rate
