# Supplementary material
Source: PubMed Central journal article supplement (PMC4401629)
Supplement: NIHMS663257-supplement-9.pdf [file NIHMS663257-supplement-9.pdf]

# Supplementary Figure 6. 3-Year Intent to Treat (ITT)

| Description | Type       | AOM/Non-AOM Ns | AOM Fx Rate | Non-AOM Rates* | Hazard Ratio |
|-------------|------------|----------------|-------------|----------------|--------------|
| ITT         | Unadjusted | 952 / 6933     | 20.05       | 32.19 /NA      | 0.62         |
|             | Adjusted   | 952 / 6933     | 20.05       | 32.19 /NA      | 0.63         |
|             | Weighted   | 952 / 6933     | 15.20       | 32.11 /NA      | 0.47         |

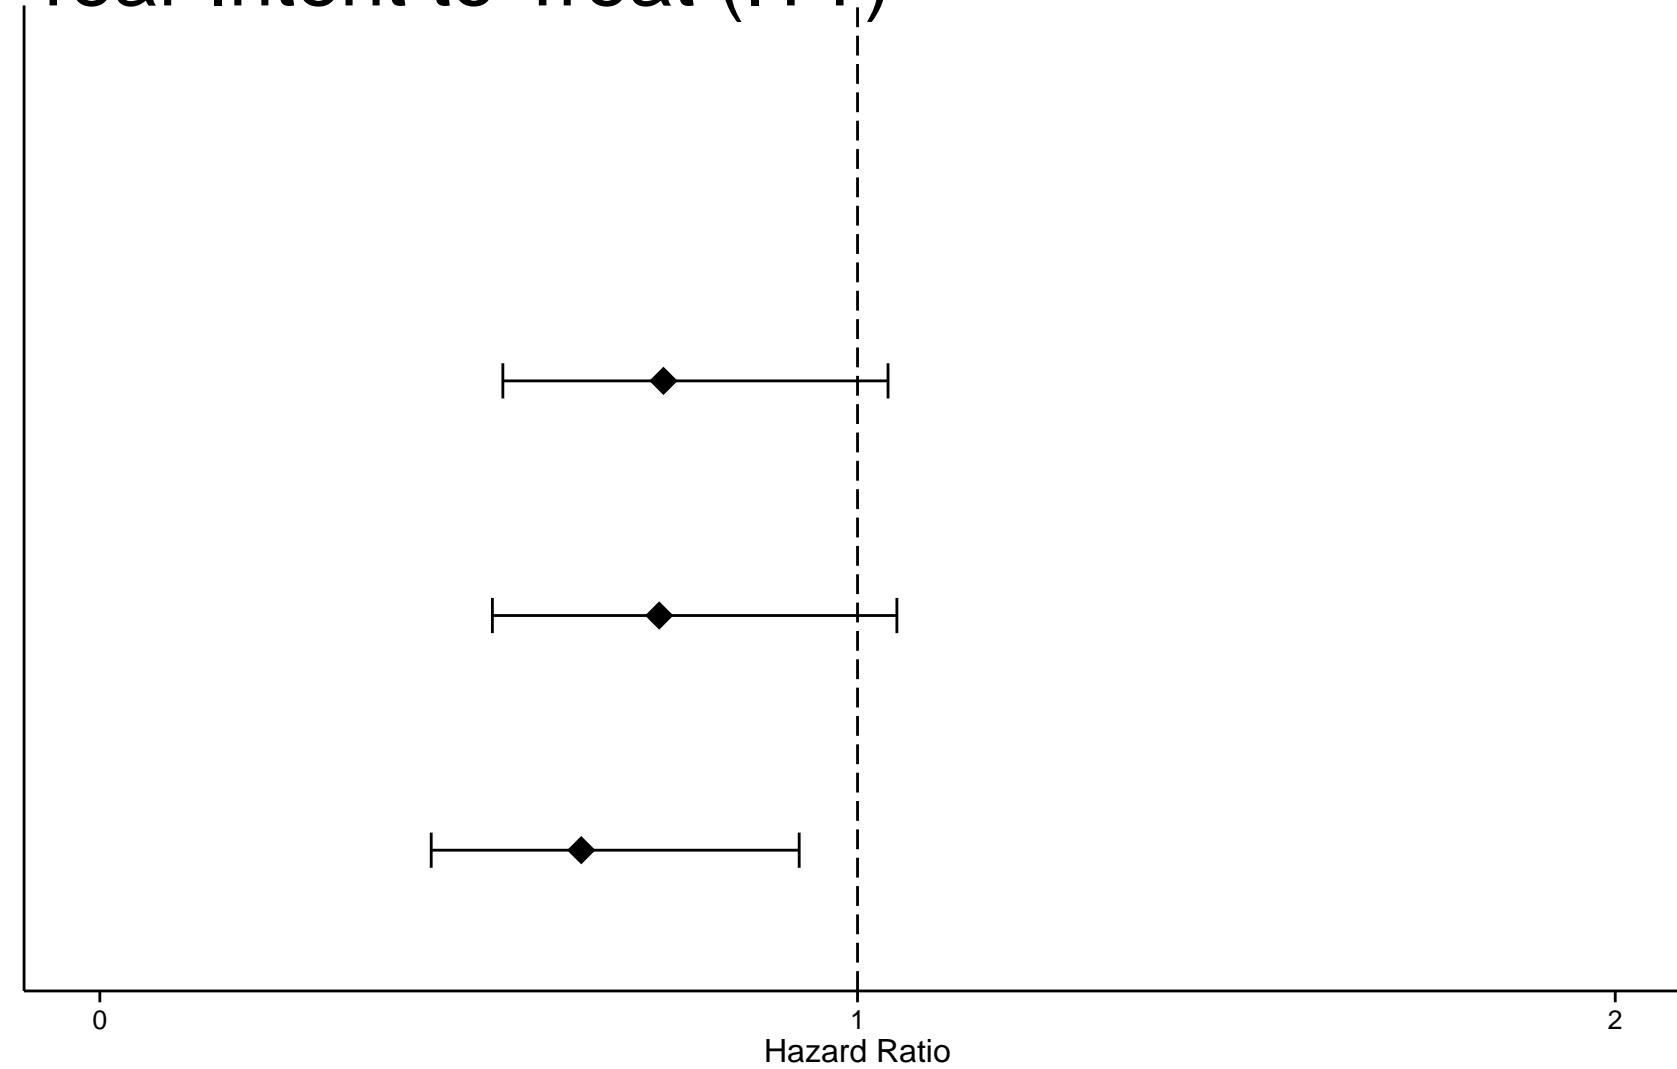

Rate: Event rate per 1,000 Person Years; <sup>a</sup>: Non-AOM Fracture Rate/Non-AOM Censor for AOM Use Rate
